# Supplementary material for: The importance of mother-child interction on smart device usage and behavaior outcomes among toddlers: a longitudinal study
Source: Research Square preprint supplement (doi:10.21203/rs.3.rs-4044024/v1), 2024-07-26
Supplement: Supplementary file 1 [file 3efe00f483b09041fe67330d.docx]

**Table 1** Distribution of parent and child characteristics, stratified by screen time trajectory and content exposure.

| Variable | Screen time trajectory  (n = 277) | | | | Communication content exposure  (n = 241) | | |
| --- | --- | --- | --- | --- | --- | --- | --- |
| Total sample a | Slightly increased  (n = 246) | Considerably increased  (n = 31) | p-value | Low use  (n = 142) | High use  (n = 99) | p-value |
| n (%) | n (%) | n (%) | n (%) |
| Maternal characteristics |  |  |  |  |  |  |  |
| Age (in years, mean ± SD) | 274 | 33.51 ± 4.06 | 33.43 ± 4.55 | 0.46 | 33.81 ± 4.17 | 32.84 ± 4.00 | 0.04 |
| Educational level | 276 |  |  |  |  |  |  |
| High school or lower |  | 71 (28.98) | 4 (12.9) | 0.084b | 9 (6.34) | 3 (3.06) | 0.202 b |
| Undergraduate or higher |  | 174 (71.02) | 27 (87.1) |  | 133 (93.66) | 95 (96.94) |  |
| Employment status | 275 |  |  |  |  |  |  |
| Unemployed |  | 26 (10.66) | 8 (25.81) | 0.016 | 17 (12.06) | 10 (10.1) | 0.637 |
| Employed |  | 218 (89.34) | 23 (74.19) |  | 124 (87.94) | 89 (89.9) |  |
| Depression level | 258 |  |  |  |  |  |  |
| Low |  | 195 (85.15) | 22 (75.86) | 0.197 | 113 (84.96) | 78 (85.71) | 0.876 |
| High |  | 34 (14.85) | 7 (24.14) |  | 20 (15.04) | 13 (14.29) |  |
| Smart device use (mean ± SD) | 119 | 180.25 ± 122.61 | 278.86 ± 157.98 | 0.003 | 183.61 ± 122.5 | 197.21 ± 132.82 | 0.296 |
| Mother–child interactions | 277 |  |  |  |  |  |  |
| Low |  | 60 (24.39) | 5 (16.13) | 0.306 | 36 (25.35) | 20 (20.2) | 0.352 |
| High |  | 186 (75.61) | 26 (83.87) |  | 106 (74.65) | 79 (79.8) |  |
| Paternal characteristics |  |  |  |  |  |  |  |
| Age (in years, mean ± SD) | 266 | 35.27 ± 4.48 | 35.7 ± 5.8 | 0.315 | 35.54 ± 4.84 | 34.64 ± 4.42 | 0.077 |
| Educational level | 274 |  |  |  |  |  |  |
| High school or lower |  | 16 (6.58) | 7 (22.58) | 0.002 | 14 (9.93) | 8 (8.25) | 0.66 |
| Undergraduate or higher |  | 227 (93.42) | 24 (77.42) |  | 127 (90.07) | 89 (91.75) |  |
| Employment status | 274 |  |  |  |  |  |  |
| Unemployed |  | 30 (12.35) | 4 (12.9) | 0.557 b | 18 (12.68) | 14 (14.58) | 0.672 |
| Employed |  | 213 (87.65) | 27 (87.1) |  | 124 (87.32) | 82 (85.42) |  |
| Depression level | 254 |  |  |  |  |  |  |
| Low |  | 176 (78.22) | 23 (79.31) | 0.893 | 101 (76.52) | 72 (80) | 0.539 |
| High |  | 49 (21.78) | 6 (20.69) |  | 31 (23.48) | 18 (20) |  |
| Smart device use (mean ± SD) | 116 | 169.69 ± 92.55 | 233.71 ± 193.39 | 0.02 | 183.61 ± 122.5 | 197.21 ± 132.82 | 0.296 |
| Child characteristics |  |  |  |  |  |  |  |
| Parity | 277 |  |  |  |  |  |  |
| Primiparous |  | 154 (62.6) | 21 (67.74) | 0.576 | 156 (64.73) | 78 (54.93) | <0.001 |
| Multiparous |  | 92 (37.4) | 10 (32.26) |  | 85 (35.27) | 64 (45.07) |  |
| Gestational age (in weeks) | 261 |  |  |  |  |  |  |
| <37 |  | 20 (8.62) | 4 (13.79) | 0.269 b | 11 (8.09) | 9 (9.78) | 0.657 |
| ≥37 |  | 212 (91.38) | 25 (86.21) |  | 125 (91.91) | 83 (90.22) |  |
| Birth weight (in g) | 277 |  |  |  |  |  |  |
| <2,500 |  | 23 (9.35) | 3 (9.68) | 0.578 b | 13 (9.15) | 9 (9.09) | 0.986 |
| ≥2,500 |  | 223 (90.65) | 28 (90.32) |  | 129 (90.85) | 90 (90.91) |  |
| Infant sex | 256 |  |  |  |  |  |  |
| Male |  | 116 (51.1) | 13 (44.83) | 0.525 | 72 (54.14) | 40 (44.44) | 0.156 |
| Female |  | 111 (48.9) | 16 (55.17) |  | 61 (45.86) | 50 (55.56) |  |
| CBCL behavioral problems (mean ± SD) |  |  |  |  |  |  |  |
| Emotional reactivity | 276 | 2.29 ± 2.05 | 2.06 ± 2.17 | 0.28 | 2.22 ± 2.16 | 2.33 ± 2.04 | 0.349 |
| Anxiety/depression | 277 | 2.54 ± 2.06 | 2.26 ± 2.21 | 0.235 | 2.64 ± 2.26 | 2.32 ± 1.85 | 0.125 |
| Somatic complaints | 276 | 1.62 ± 1.41 | 1.74 ± 1.71 | 0.335 | 1.62 ± 1.51 | 1.58 ± 1.33 | 0.42 |
| Withdrawal | 277 | 1.46 ± 1.68 | 1.68 ± 2.21 | 0.253 | 1.52 ± 1.89 | 1.36 ± 1.63 | 0.251 |
| Sleep problems | 276 | 3.27 ± 2.53 | 3 ± 2.32 | 0.29 | 3.17 ± 2.5 | 3.29 ± 2.47 | 0.361 |
| Attention problems | 277 | 2.06 ± 1.6 | 2.32 ± 1.38 | 0.192 | 2.12 ± 1.65 | 2.04 ± 1.49 | 0.352 |
| Aggressive behavior | 276 | 8.18 ± 5.88 | 7.42 ± 5.93 | 0.251 | 8.06 ± 6.13 | 7.72 ± 5.34 | 0.329 |
| Internalizing behavior | 276 | 7.92 ± 5.58 | 7.74 ± 6.67 | 0.434 | 8 ± 6.25 | 7.6 ± 5.2 | 0.302 |
| Externalizing behavior | 276 | 10.24 ± 6.93 | 9.74 ± 7.03 | 0.354 | 10.18 ±7.34 | 9.77 ± 6.29 | 0.323 |
| Total | 276 | 30.22 ±  17.62 | 29.65 ± 21.13 | 0.433 | 30.25 ± 19.36 | 29.06 ± 16.41 | 0.31 |

SD: standard deviation. a Total count may vary because of missing values. b Fisher’s exact test; all other values are from chi-squared tests.

**Table 2** Distribution of parent and child characteristics, stratified by educational, game and cartoon content exposure.

| Variable | Educational content  (n = 241) | | | | Game and cartoon content  (n = 243) | | |
| --- | --- | --- | --- | --- | --- | --- | --- |
| Total sample a | Low use  (n = 139) | High use  (n = 102) | p-value | Low use  (n = 118) | High use  (n = 125) | p-value |
| n (%) | n (%) | n (%) | n (%) |
| Maternal characteristics |  |  |  |  |  |  |  |
| Age (in years, mean ± SD) | 239 | 33.72 ± 3.97 | 32.98 ± 4.32 | 0.085 | 33.69 ± 3.76 | 33.13 ± 4.43 | 0.145 |
| Educational level | 240 |  |  |  |  |  |  |
| High school or lower |  | 6 (4.35) | 7 (6.86) | 0.395 | 7 (5.93) | 6 (4.84) | 0.706 |
| Undergraduate or higher |  | 132 (95.65) | 95 (93.14) |  | 111 (94.07) | 118 (95.16) |  |
| Employment status | 240 |  |  |  |  |  |  |
| Unemployed |  | 16 (11.51) | 13 (12.87) | 0.75 | 15 (12.71) | 14 (11.29) | 0.734 |
| Employed |  | 123 (88.49) | 88 (87.13) |  | 103 (87.29) | 110 (88.71) |  |
| Depression level | 224 |  |  |  |  |  |  |
| Low |  | 114 (85.07) | 76 (84.44) | 0.897 | 95 (84.82) | 96 (84.96) | 0.978 |
| High |  | 20 (14.93) | 14 (15.56) |  | 17 (15.18) | 17 (15.04) |  |
| Smart device use (mean ± SD) | 103 | 177.22 ± 130.89 | 215.51 ±  133.05 | 0.073 | 164.71 ± 124.13 | 218.65 ± 134.93 | 0.02 |
| Mother–child interactions | 241 |  |  |  |  |  |  |
| Low |  | 36 (25.9) | 19 (18.63) | 0.184 | 29 (24.58) | 26 (20.8) | 0.482 |
| High |  | 103 (74.1) | 83 (81.37) |  | 89 (75.42) | 99 (79.2) |  |
| Paternal characteristics |  |  |  |  |  |  |  |
| Age (in years, mean ± SD) | 230 | 35.5 ± 4.4 | 34.94 ± 5.15 | 0.189 | 35.42 ± 4.3 | 35.08 ± 5.09 | 0.297 |
| Educational level | 238 |  |  |  |  |  |  |
| High school or lower |  | 10 (7.35) | 12 (11.76) | 0.245 | 9 (7.69) | 13 (10.57) | 0.44 |
| Undergraduate or higher |  | 126 (92.65) | 90 (88.24) |  | 108 (92.31) | 110 (89.43) |  |
| Employment status | 238 |  |  |  |  |  |  |
| Unemployed |  | 24 (17.52) | 8 (7.92) | 0.03 | 19 (16.24) | 13 (10.57) | 0.196 |
| Employed |  | 113 (82.48) | 93 (92.08) |  | 98 (83.76) | 110 (89.43) |  |
| Depression level | 222 |  |  |  |  |  |  |
| Low |  | 103 (77.44) | 70 (78.65) | 0.832 | 84 (76.36) | 90 (79.65) | 0.554 |
| High |  | 30 (22.56) | 19 (21.35) |  | 26 (23.64) | 23 (20.35) |  |
| Smart device use (mean ± SD) | 102 | 189.7 ± 123.88 | 169.24 ± 105.73 | 0.19 | 196.4 ± 141.56 | 165.38 ± 86.36 | 0.088 |
| Child’s characteristics |  |  |  |  |  |  |  |
| Parity | 241 |  |  |  |  |  |  |
| Primiparous |  | 92 (66.19) | 63 (61.76) | 0.479 | 75 (63.56) | 82 (65.6) | 0.74 |
| Multiparous |  | 47 (33.81) | 39 (38.24) |  | 43 (36.44) | 43 (34.4) |  |
| Gestational age (in weeks) | 228 |  |  |  |  |  |  |
| <37 |  | 14 (10.53) | 6 (6.32) | 0.268 | 12 (10.81) | 8 (6.72) | 0.272 |
| ≥37 |  | 119 (89.47) | 89 (93.68) |  | 99 (89.19) | 111 (93.28) |  |
| Birth weight (in g) | 241 |  |  |  |  |  |  |
| <2,500 |  | 15 (10.79) | 7 (6.86) | 0.295 | 9 (7.63) | 13 (10.4) | 0.452 |
| ≥2,500 |  | 124 (89.21) | 95 (93.14) |  | 109 (92.37) | 112 (89.6) |  |
| Infant sex | 223 |  |  |  |  |  |  |
| Male |  | 62 (47.69) | 50 (53.76) | 0.371 | 55 (50.46) | 59 (50.86) | 0.952 |
| Female |  | 68 (52.31) | 43 (46.24) |  | 54 (49.54) | 57 (49.14) |  |
| CBCL behavioral problems (mean ± SD) |  |  |  |  |  |  |  |
| Emotional reactivity | 240 | 2.32 ± 1.98 | 2.21 ± 2.28 | 0.338 | 2.16 ± 1.88 | 2.36 ± 2.29 | 0.233 |
| Anxiety/depression | 241 | 2.45 ± 1.78 | 2.67 ± 2.47 | 0.211 | 2.45 ± 1.82 | 2.6 ± 2.33 | 0.288 |
| Somatic complaints | 240 | 1.71 ± 1.42 | 1.52 ± 1.51 | 0.173 | 1.62 ± 1.38 | 1.62 ± 1.53 | 0.5 |
| Withdrawal | 241 | 1.51 ± 1.65 | 1.4 ± 1.95 | 0.32 | 1.37 ± 1.61 | 1.54 ± 1.93 | 0.238 |
| Sleep problems | 240 | 3.21 ± 2.34 | 3.26 ± 2.68 | 0.441 | 3.03 ± 2.14 | 3.39 ± 2.75 | 0.126 |
| Attention problems | 241 | 2.1 ± 1.46 | 2.11 ± 1.75 | 0.486 | 2.01 ± 1.38 | 2.18 ± 1.75 | 0.194 |
| Aggressive behavior | 240 | 7.97 ± 5.05 | 7.99 ± 6.71 | 0.49 | 7.97 ± 4.95 | 7.9 ± 6.5 | 0.467 |
| Internalizing behavior | 240 | 7.99 ± 5.04 | 7.81 ± 6.75 | 0.41 | 7.62 ± 4.92 | 8.12 ± 6.53 | 0.25 |
| Externalizing behavior | 240 | 10.07 ± 6.05 | 10.1 ± 7.96 | 0.488 | 9.97 ± 5.82 | 10.09 ± 7.79 | 0.449 |
| Total | 240 | 30.05± 15.57 | 29.9 ± 21.42 | 0.475 | 29.35 ± 14.97 | 30.38 ± 20.81 | 0.33 |

SD: standard deviation. a Total count may vary because of missing values.
