# Supplementary material for: The importance of mother-child interction on smart device usage and behavaior outcomes among toddlers: a longitudinal study
Source: Research Square preprint supplement (doi:10.21203/rs.3.rs-4044024/v1), 2024-07-26
Supplement: Supplementary file 2 [file fb948c1c924edd8a7e813b2a.docx]

**Table 4** Associations between children’s media content exposure and behavioral problems stratified by mother–child interaction.

| **Behavioral outcome** | **Educational content**a | | **Game and cartoon content**a | | **Communication content**a | |
| --- | --- | --- | --- | --- | --- | --- |
| **Mother–child interaction**  **trajectories** | | **Mother–child interaction**  **trajectories** | | **Mother–child interaction**  **trajectories** | |
| **Low (n=55)** | **High (n=186)** | **Low (n=55)** | **High (n=188)** | **Low (n=56)** | **High (n=185)** |
| aβ (95% CI)**b** | aβ (95% CI)**b** | aβ (95% CI)**b** | aβ (95% CI)**b** | aβ (95% CI)**b** | aβ (95% CI)**b** |
| **Media content exposure [highvs. low use (reference)]** | | | | | | |
| Emotional reactivity | 1.16 (−0.37 to 2.69) | −0.26 (−0.91 to 0.38) | **1.37(0.01 to 2.73)** | 0.04 (−0.6 to 0.67) | −0.26 (−2.28 to 1.76) | 0.01 (−0.64 to 0.67) |
| Anxiety/depression | 0.23 (−1.17 to 1.63) | 0.17 (−0.5 to 0.85) | **1.54(0.39 to 2.7)** | −0.11 (−0.77 to 0.54) | 0.77 (−1.03 to 2.57) | −0.32 (−1 to 0.35) |
| Somatic complaints | 0.13 (−1.04 to 1.3) | **−0.42 (−0.83 to −0.01)** | **1.24(0.27 to 2.22)** | −0.3 (−0.71 to 0.11) | 0.15 (−1.34 to 1.65) | 0.13 (−0.3 to 0.55) |
| Withdrawal | 0.43 (−1.12 to 1.98) | −0.23 (−0.76 to 0.29) | **1.58(0.28 to 2.88)** | −0.15 (−0.66 to 0.37) | **2.04(0.18 to 3.9)** | −0.07 (−0.6 to 0.46) |
| Sleep problems | 1.25 (−0.72 to 3.22) | −0.04 (−0.81 to 0.72) | 1.5 (−0.25 to 3.25) | −0.02 (−0.77 to 0.73) | 0.73 (−1.83 to 3.3) | 0.07 (−0.7 to 0.84) |
| Attention problems | 0.81 (−0.3 to 1.92) | 0.00(−0.51 to 0.5) | 0.43 (−0.59 to 1.45) | 0.26 (−0.23 to 0.75) | −0.54 (−1.97 to 0.89) | 0.14 (−0.37 to 0.64) |
| Aggressive behavior | **4.38(0.59 to 8.16)** | −0.89 (−2.56 to 0.78) | 2.79 (−0.77 to 6.35) | −0.99 (−2.63 to 0.64) | −1.75 (−6.89 to 3.39) | 0.29 (−1.39 to 1.97) |
| Internalizing behavior | 1.95 (−2.61 to 6.52) | −0.74 (−2.47 to 0.99) | **5.74(2.06 to 9.42)** | −0.52 (−2.22 to 1.18) | 2.7 (−3.16 to 8.57) | −0.25 (−2 to 1.49) |
| Externalizing behavior | **5.19(0.67 to 9.7)** | −0.89 (−2.89 to 1.12) | 3.22 (−1.04 to 7.48) | −0.73 (−2.7 to 1.23) | −2.29 (−8.41 to 3.82) | 0.43 (−1.59 to 2.45) |
| Total | 9.77 (−3.45 to 22.99) | −2.06 (−7.33 to 3.2) | **13.14(1.64 to 24.63)** | −1.8 (−6.96 to 3.36) | 2.08 (−15.34 to 19.5) | 0.5 (−4.8 to 5.81) |

a Total count may vary because of missing values.

**b**Adjusted for maternal age, maternal educational level, maternal depression level, paternal age, parity, preterm birth, child’s low birth weight status, and child’s sex.
